1 **Prevalence, treatment, and factors associated with cryptococcal meningitis post introduction**  
2 **of integrase inhibitors antiretroviral based regimens among people living with HIV in**  
3 **Tanzania**

4 Makyao Minja<sup>1</sup>, Tusaligwe Mbilinyi<sup>2</sup>, Bryceson Mkinga<sup>3</sup>, Erick G. Philipo<sup>4</sup>, Joyce Owenya<sup>5</sup>, and  
5 Manase Kilonzi<sup>1\*</sup>

6 *Affiliations*

7 <sup>1</sup>Department of Clinical Pharmacy and Pharmacology, School of Pharmacy, the Muhimbili  
8 University of Health and Allied Sciences, Dar es Salaam, Tanzania.

9 <sup>2</sup>Department of Pharmaceutical Microbiology, School of Pharmacy, the Muhimbili University of  
10 Health and Allied Sciences, Dar es Salaam, Tanzania.

11 <sup>3</sup>Department of Pharmacognosy, School of Pharmacy, the Muhimbili University of Health and  
12 Allied Sciences, Dar es Salaam, Tanzania.

13 <sup>4</sup>Department of Pharmaceutics and Pharmacy Practice, School of Pharmacy, the Muhimbili  
14 University of Health and Allied Sciences, Dar es Salaam, Tanzania.

15 <sup>5</sup>Department of Pharmacy, Temeke Regional Referral Hospital, Dar es Salaam, Tanzania.

16 Corresponding author: [manasekilonzi@gmail.com](mailto:manasekilonzi@gmail.com), +255 688 045752

17

18

19

20

21 **Abstract**

22 **Objective:** This study aimed to assess the prevalence of CM, treatment practice, and the associated  
23 factor's post-introduction of Tenofovir Lamivudine and Dolutegravir (TLD) regimen among  
24 PLHIV in Tanzania.

25 **Methods:** This was an analytical cross-sectional study, and the data was collected retrospectively  
26 in three public regional referral hospitals (RRHs) in Dar es Salaam, Tanzania. A total of 405 files  
27 of the PLHIV admitted in the medical wards on the TLD regimen from January 2019 to December  
28 2022 were reviewed. The collected information includes patient demographic characteristics,  
29 Cryptococcal status, CD4 level at the time of CM diagnosis, status of using ART, CM treatment  
30 approach, and outcome. Data was analyzed using SPSS software version 23.

31 **Results:** Out of 405, the majority 267(65.9%) were female, 224(55.3%) were aged between 36 -  
32 55 years, and 293(72.3%) married. ART defaulters were found to be 37(9.1%). The prevalence of  
33 CM was found to be 48(11.9%), out of which 42(87.5%) received fluconazole alone. ART  
34 defaulter and marital status significantly ( $p$ -value  $< 0.05$ ) were associated with those who tested  
35 CM positive.

36 **Conclusion:** The study found the prevalence of CM among PLHIV to be significantly high and  
37 the majority were treated with fluconazole alone. ART defaulters and marital status were  
38 significantly associated with one being CM positive. Responsible authorities and stakeholders  
39 should enforce guideline adherence and PLHIV should be encouraged on medication adherence.

40 **Keywords:** Cryptococcal meningitis, Fluconazole, Triple therapy, Prevalence, Treatment,  
41 Tanzania

42

## 43 **I. Introduction**

44 Cryptococcal Meningitis (CM) is one of the leading causes of laboratory-confirmed meningitis in  
45 adults living in countries with a high burden of HIV especially in Sub-Saharan Africa (SSA) [1,2].  
46 CM accounts for over 100,000 incident cases of meningitis per year in the SSA [3]. The burden of  
47 CM in PLHIV is high and globally is estimated to cause 15%-20% of HIV-related deaths. In low-  
48 income countries (LICs) 220,000 cases of CM are estimated per year resulting in 181,000 deaths  
49 [4]. In Tanzania, reports have shown that cryptococcosis has 50% fatality at any dose of antifungal  
50 given [5]. CM is an opportunistic fungal infection usually affecting immune-compromised hosts  
51 like People Living with Human Immune-deficiency Virus (PLHIV), diabetic patients, solid organ  
52 transplant recipients, and patients receiving immunosuppressant [6]. The infection is not  
53 transferred from person to person, but results from the inhalation of infectious spores mainly found  
54 in bird droppings, that multiply in the lungs and can spread to the membranes covering the brain  
55 and spinal cord causing meningitis [7]. In HIV-infected patients, the disease is considered as a  
56 result of recurrence of latent infection which occurs months to years after the initial exposure event  
57 [8,9].

58 In 2019, Tanzania introduced a Dolutegravir (DTG) based regimen of TLD as the preferred first-  
59 line antiretroviral therapy (ART) for most adults and adolescents for HIV-1 infections [10]. From  
60 the two landmark clinical trials named ADVANCE and NAMSAL performed in SSA, the efficacy  
61 of DTG, and non-emergence of resistance support its use as a first-line regimen for ART-naïve  
62 adults with HIV-1 [11]. Patients on the DTG-based regimen had high weight and the viral load  
63 was suppressed more quickly compared to the Efavirenz-based regimen [12]. TLD is affordable  
64 and well tolerated and improves the clinical outcomes of patients) [13,14]. On the other hand, triple  
65 therapy of Amphotericin B, flucytosine (5-FC), and fluconazole is recommended for the treatment

66 of CM. The guidelines recommend two weeks of amphotericin B and 5-FC for the induction phase,  
67 followed by fluconazole for the merging and maintenance phases of treatment [15]. Studies report  
68 that the use of fluconazole alone is inferior and is associated with high morbidity and mortality  
69 compared to triple therapy [16]. However, despite advances in HIV, and CM management, the  
70 majority of PLHIV-living LICs face hospital acute mortality in the range between 30-50% [17].

71 Other factors associated with the burden of CM among PLHIV are reported to be; Being ART  
72 naïve and ART defaulter, being male, living in rural areas, being hospitalized, having low CD4  
73 count, and having increasing age with CD4<100 cells, and having body mass index of  
74 <18.5kg/m<sup>2</sup>[18]. Making age, gender, body mass index, and ART adherence major determining  
75 factors for cryptococcal infection among PLHIV [19].

76 Similar to other World Health Organization (WHO) member states, Tanzania adopted the use of a  
77 integrase inhibitors-based ART regimen as first-line therapy for adults with PLHIV, and through  
78 its guidelines, triple therapy was introduced for the management of CM. Despite the efforts made  
79 by the WHO and its member states, the majority of deaths among PLHIV are associated with CM  
80 [20]. However, there is a scarcity of information with regard to the prevalence of CM and treatment  
81 practice's post-introduction of integrase inhibitors-based regimens as first-line therapy for PLHIV  
82 in LICs. Therefore, this study aims to determine the prevalence, treatment practice, and associated  
83 factors of CM among PLHIV post-introduction of TLD in Dar es Salaam, Tanzania.

## 84 **II. Materials and Methods**

### 85 **A. Study design and area**

86 This was a hospital-based cross-sectional study using a retrospective data collection approach.  
87 Data were collected from March to June 2023 in public regional referral hospitals (RRHs) in Dar

88 es Salaam, Tanzania i.e., Temeke, Amana, and Mwananyamala referral hospitals. The chosen  
89 hospitals have Care and Treatment Centers (CTC) that serve the majority of PLHIV residing in  
90 Dar es Salaam city and surrounding areas.

#### 91 **B. Study population**

92 People Living with HIV (PLHIV) admitted to the medical wards on TLD from 2019 to 2022 in  
93 the three RRHs (Temeke, Amana, and Mwananyamala).

#### 94 **C. Sample size and sampling technique**

95 A minimum sample size of 153 PLHIV was estimated using the formula for cross-sectional study  
96 ( $n = p(1-p) z^2/d^2$ ). Assuming a population of 7.1% from a previous study on the “burden of serious  
97 fungal infection” conducted in Tanzania[6], the confidence level of 95% ( $z = 1.96$ ) and precision  
98 (d) of 5%,. On data collection, a total of 405 PLHIV on TLD admitted to the medical wards from  
99 2019 to 2022 files were retrieved in the three visited RRHs.

#### 100 **D. Data collection**

101 An Excel spreadsheet was used to collect data from patients’ files, laboratory test results, and Care  
102 and Treatment Clinic (CTC) cards where sections involving treatment practice and associated  
103 factors were included, as information about associated risk factors, treatment practice, and  
104 prevalence was obtained. The information was collected with the assistance of the respected  
105 facility's responsible healthcare worker. On days of data collection data collectors were given files  
106 of the HIV patients admitted in medical wards from 2019 to 2022 from the archives. To observe  
107 confidentiality names and other information which could identify the participant were not  
108 documented.

109 **E. Data analysis**

110 Data obtained was analyzed by using Statistical Package for Social Science (SPSS) software,  
111 version 23. Descriptive statistics was used to summarize socio-demographic and clinical  
112 characteristics; the Chi-square test was used to analyze variables associated with the prevalence of  
113 CM and treatment outcomes among those who tested CM positive. A p-value below 0.05 was  
114 considered statistically significant.

115 **F. Ethical issues**

116 Ethical clearance was obtained from the Muhimbili University of Health and Allied Sciences  
117 (MUHAS)- Research Ethics Committee (REC). The protocol stated clear that the study will  
118 retrieve information from patients medical records and the clearance was issued MUHAS-REC:  
119 Ref. No. DA. 283/298/01L/602). Permission from the three RRHs administrations (Temeke,  
120 Amana, and Mwananyamala) was sought before data collection. Patients' files were obtained from  
121 medical file archives and special identification number was assigned for each file to protect  
122 confidentiality of the participants information. Participants name and another information that  
123 could identify the participants were not abducted from the files.

124 **III. Results**

125 **A. Demographic characteristics of study participants**

126 Out of 405 participants, the majority 224 (55.3%) were between 36-55 years followed by  
127 98(24.2%), 18-35 years of age. Regarding employment status, the majority 167(41.2%) were self-  
128 employed and 293(72.3%) were married. Besides, most 267(65.9%) of the participants were  
129 female and 37(9.1%) were ART defaulter(**table1**).

130 *Table 1: Demographic characteristics of study participants (n=405)*

| <b>Variables</b>            | <b>Median (Range)</b> | <b>n(%)</b> |
|-----------------------------|-----------------------|-------------|
| Age (years)                 | 43 (2-78) years       |             |
| <b>Age category (years)</b> |                       |             |
| <18                         |                       | 28(6.9)     |
| 18-35                       |                       | 98(24.2)    |
| 36-55                       |                       | 224(55.3)   |
| >55                         |                       | 55(13.6)    |
| <b>Sex</b>                  |                       |             |
| Female                      |                       | 267 (65.9)  |
| Male                        |                       | 138 (34.1)  |
| <b>Occupation</b>           |                       |             |
| Employed                    |                       | 150(37.0)   |
| Self-employed               |                       | 167(41.2)   |
| Unemployed                  |                       | 88(21.7)    |
| <b>Marital status</b>       |                       |             |
| Married                     |                       | 293(72.3)   |
| Unmarried                   |                       | 112(27.7)   |
| <b>ART Defaulter</b>        |                       |             |
| Yes                         |                       | 37(9.1)     |
| No                          |                       | 368(90.9)   |

132 **B. Prevalence of CM, CD4 count at diagnosis, treatment approach and**  
133 **Outcome of treatment among participants**

134 Out of 405 participants, 48 (11.9%) tested CM positive. Of those who tested positive, 6(12.5%)  
135 received triple therapy (fluconazole, 5FC, and amphotericin) while 42(87.5%) received  
136 fluconazole alone. Following treatment, 4(8.9%) died, 18(40%) recovered, 17(37.8%) were lost to  
137 follow-up, 2(4.4%) were given referral, and 4(8.9%) were on going with treatment (**table 2**).

138 *Table 2: Prevalence of cryptococcal meningitis, CD4 count at diagnosis, treatment approach, and*  
139 *Outcome of treatment among participants (n=405)*

| <b>Variable</b>                                                                         | <b>n(%)</b> |
|-----------------------------------------------------------------------------------------|-------------|
| <b>Cryptococcal meningitis status (n =405)</b>                                          |             |
| Positive                                                                                | 48(11.9)    |
| Negative                                                                                | 357(88.1)   |
| <b>CD4 count (cells/<math>\mu</math>L) at diagnosis Cryptococcal meningitis (n =48)</b> |             |
| <200                                                                                    | 39(81.3)    |
| $\geq$ 200                                                                              | 9(18.8)     |
| <b>Treatment regimen used (n=48)</b>                                                    |             |
| flu, 5FC, and amphotericin B                                                            | 6(12.5)     |
| fluconazole                                                                             | 42(87.5)    |
| <b>Treatment Outcomes (n=45)</b>                                                        |             |
| Died                                                                                    | 4(8.9)      |
| Recovered                                                                               | 18(40)      |
| Loss To Follow up                                                                       | 17(37.8)    |

|              |        |
|--------------|--------|
| Referred     | 2(4.4) |
| On treatment | 4(8.9) |

140

141 **C. Factors associated with CM status among study participants**

142 Following Pearson chi-square test, all 37 (100%) ART defaulters tested CM positive compared to  
 143 non-defaulters; the difference was statistically significant (p-value < 0.01). While those unmarried  
 144 24(21.4%) significantly (p-value < 0.01) tested CM positive compared to those who are in  
 145 marriage 24(8.1%). Other factors including age, sex, and occupation were not associated with  
 146 being CM-positive among the participants (**table 3**).

147 *Table 3: Showing Pearson chi-square test of the demographic characteristics and Cryptococcal*  
 148 *meningitis status among participants (n = 405)*

| Variables                   | Cryptococcal meningitis status |           | P-value |
|-----------------------------|--------------------------------|-----------|---------|
|                             | Positive                       | Negative  |         |
| Age (years)                 |                                |           |         |
| <b>Age category (years)</b> |                                |           |         |
| <18                         | 0(0.0)                         | 28(100)   | 0.80    |
| 18-35                       | 17(17.3)                       | 81(82.7)  |         |
| 36-55                       | 25(11.2)                       | 199(88.8) |         |
| >55                         | 6(10.9)                        | 49(89.1)  |         |
| <b>Sex</b>                  |                                |           |         |
| Female                      | 23(16.7)                       | 115(83.3) | 0.31    |
| Male                        | 25(9.4)                        | 242(90.6) |         |
| <b>Occupation</b>           |                                |           |         |

|                       |          |           |        |
|-----------------------|----------|-----------|--------|
| Employed              | 8(9.1)   | 80(90.9)  | 0.64   |
| Self-employed         | 20(13.2) | 132(86.8) |        |
| Unemployed            | 20(12.1) | 145(87.9) |        |
| <b>Marital status</b> |          |           |        |
| Married               | 24(8.2)  | 269(91.8) | < 0.01 |
| Unmarried             | 24(21.4) | 88(78.6)  |        |
| <b>ART defaulter</b>  |          |           |        |
| Yes                   | 37(100)  | 0(0.0)    | < 0.01 |
| No                    | 11(3.0)  | 357(97.0) |        |

149

150 **D. Factors associated with Cryptococcal meningitis treatment outcomes among**  
 151 **study participants**

152 Among those who were given a recommended regimen none died, none neither had loss to follow  
 153 up nor referral, 3(60.0%) recovered and 2(40%) were on going with treatments while among those  
 154 given fluconazole alone; 4(10%) died, 15(37.5%) recovered, 17(42.5%) were loss to follow up,  
 155 2(5%) were referred and 2(5%) are ongoing with treatment and the difference were slightly  
 156 significant (p-value = 0.048). Other factors like age, sex, occupation, marital status, ART defaulter  
 157 status, and CD4 count at the time of diagnosis were not statistically related to CM treatment  
 158 outcome. However, for those who had a CD4 count < 200 cells/ $\mu$ L at the time of diagnosis, 4  
 159 (11.1%) died, and 12(33.3%) recovered while those who had a CD4 count of  $\geq$ 200 cells/ $\mu$ L none  
 160 died, 6(66.7%) recovered (**table 4**)

161 **Table 4:** Showing Pearson chi-square test of the demographic characteristics and Cryptococcal  
 162 meningitis status among participants (n=45)

| Variable                                                | Treatment Outcomes n (%) |           |                   |          |              | P-value |
|---------------------------------------------------------|--------------------------|-----------|-------------------|----------|--------------|---------|
|                                                         | Died                     | Recovered | Loss To Follow up | Referred | On treatment |         |
| <b>Age category</b>                                     |                          |           |                   |          |              |         |
| <18                                                     | 0(0.0)                   | 0(0.0)    | 0(0.0)            | 0(0.0)   | 0(0.0)       | 0.31    |
| 18-35                                                   | 0(0.0)                   | 7(46.7)   | 7(46.7)           | 1(6.7)   | 0(0.0)       |         |
| 36-55                                                   | 2(8.3)                   | 10(41.7)  | 8(33.3)           | 1(4.2)   | 3(12.5)      |         |
| >55                                                     | 2(33.3)                  | 1(16.7)   | 2(33.3)           | 0(0.0)   | 1(16.7)      |         |
| <b>Sex</b>                                              |                          |           |                   |          |              |         |
| Male                                                    | 3(14.3)                  | 9(42.9)   | 7(33.3)           | 1(4.8)   | 1(4.8)       | 0.68    |
| Female                                                  | 1(4.2)                   | 9(37.5)   | 10(41.7)          | 1(4.2)   | 3(12.5)      |         |
| <b>Occupation</b>                                       |                          |           |                   |          |              |         |
| Unemployed                                              | 0(0.0)                   | 2(28.6)   | 4(57.1)           | 1(14.3)  | 0(0.0)       | 0.28    |
| Employed                                                | 1(5.0)                   | 7(35.0)   | 10(50.0)          | 0(0.0)   | 2(10.0)      |         |
| Self employed                                           | 3(16.7)                  | 9(50.0)   | 3(16.7)           | 1(5.6)   | 2(11.1)      |         |
| <b>Marital status</b>                                   |                          |           |                   |          |              |         |
| Married                                                 | 3(13.6)                  | 11(50.0)  | 7(31.8)           | 0(0.0)   | 1(4.5)       | 0.25    |
| Unmarried                                               | 1(4.3)                   | 7(30.4)   | 10(43.5)          | 2(8.7)   | 3(13.0)      |         |
| <b>ART defaulter</b>                                    |                          |           |                   |          |              |         |
| Yes                                                     | 3(8.8)                   | 14(41.2)  | 12(35.3)          | 1(2.9)   | 4(11.8)      | 0.69    |
| No                                                      | 1(9.1)                   | 4(36.4)   | 5(45.5)           | 1(9.1)   | 0(0.0)       |         |
| <b>CD4 count at diagnosis (cells/<math>\mu</math>L)</b> |                          |           |                   |          |              |         |
| <200                                                    | 4(11.1)                  | 12(33.3)  | 15(41.7)          | 2(5.6)   | 3(8.3)       |         |

|                          |         |          |          |         |         |       |
|--------------------------|---------|----------|----------|---------|---------|-------|
| ≥200                     | 0(0.0)  | 6(66.7)  | 2(22.2)  | 0(0.00) | 1(11.1) | 0.37  |
| <b>Treatment regimen</b> |         |          |          |         |         |       |
| Flu,5FC,<br>amphotericin | 0(0.0)  | 3(60.0)  | 0(0.0)   | 0(0.0)  | 2(40.0) | 0.048 |
| Fluconazole              | 4(10.0) | 15(37.5) | 17(42.5) | 2(5.0)  | 2(5.0)  |       |

163

164 **IV. Discussion**

165 The objective of this study was to determine the prevalence, treatment, and factors associated with  
 166 CM post-introduction of TLD regimen among PLHIV in Tanzania. Out of 405 reviewed patient  
 167 files, the study found that 11.9% had CM, out of which 12.5% received the recommended regimen  
 168 (triple therapy = Fluconazole, 5-FC, and amphotericin B) and 87.5% received fluconazole alone.  
 169 Following treatment, 40% recovered while 37.8% were lost to follow-up. ART defaulter and  
 170 marital status were significantly associated with those who tested CM positive; neither of those  
 171 treated with triple therapy died, referred, or lost to follow-up compared to those on fluconazole  
 172 alone.

173 The prevalence observed in our study is comparable to what was observed in developing countries  
 174 like Cameroon (11.2%), and Ethiopia (11.4%) [21,22]. The reported prevalence is slightly higher  
 175 than what was observed in Sierra Leone (7.7%) and Indonesia (7.1%) and higher than what was  
 176 reported in London (5%), Nigeria (5.1%) and Haiti (1.1%) [23,24]. Varying prevalence's of CM  
 177 were observed in different studies could be due to the type of the study design and data collection  
 178 approaches. Also, some studies included all naive and experienced PLHIV patients while others  
 179 recruited only those on ART for some time. Our studies assess the CM status of the PLHIV

180 admitted in the hospital for medical reasons which could explain the observed high prevalence.  
181 Nevertheless, differences in laboratory protocol, healthcare system, and geographical location of  
182 the study settings have been associated with the inconsistency of the reported CM prevalence  
183 among PLHIV [25,26]. Since CM is acquired through inhalation of the yeast droplet from the air,  
184 weather condition differences may also influence the reported prevalence.

185 The study demonstrated that only 12.5% of those with CM were treated with the recommended  
186 regimen which is a combination of Amphotericin B and 5-FC during the induction course and  
187 Fluconazole during the completion phase. The uses of Amphotericin B and flucytosine are reported  
188 to reduce CM-related mortality by 40% and clinical trials report that the use of fluconazole alone  
189 in the management of CM is inferior [16]. Similar to findings from this study PLHIV with CM  
190 treated with fluconazole alone, the majority died or were lost to follow-up compared to those given  
191 triple therapy. Despite being recommended by WHO and adopted by member countries like  
192 Tanzania, the use of triple therapy in the management of CM in most of the developing countries  
193 is low [27]. The poor availability of 5-FC and amphotericin B and the associated cost of purchasing  
194 the two medications could be a reason for their poor use in developing countries [28]. The use of  
195 a drug like amphotericin B requires laboratory tests prior to and during the time of using the drug  
196 in order to prevent patients from toxicity [29]. The latter increases the cost of treatment, taking  
197 into consideration that the majority of people in developing countries rely on out-of-pocket mode  
198 of payment and the level of poverty could be a reason why healthcare providers (HCPs) opt to use  
199 fluconazole alone [30].

200 In addition, triple therapy involves a different route of drug administration, as fluconazole and 5-  
201 FC are given by infusion, and amphotericin B is given intrathecally. The competency of  
202 administering amphotericin B among HCPs and the complexity of monitoring for toxicity could

203 be another reason why most HCPs opt for the use of fluconazole alone [31] Training of the HCPs  
204 and people involved in the care of PLHIV on how to use triple therapy should be in place to equip  
205 HCPs with knowledge and skills on how to dose and administer the medications [28].  
206 Nevertheless, in Tanzania, as in other developing countries patients appear late in the hospital and  
207 PLHIV with CM end up admitted and treated as an inpatient through a medical ward. However,  
208 medicines and consumables for PLHIV which are purchased and sent to the facilities through a  
209 vertical program are available in the CTC. Therefore, proper communication should be initiated to  
210 ensure PLHIV admitted in the wards receive medications from CTC. The latter will foster the use  
211 of triple therapy as fluconazole, 5-FC, and amphotericin B are grouped as drugs for opportunistic  
212 infections (OIs) and are procured through vertical programs [29,32].

213 The study also observed that ART defaulters were significantly associated with those who tested  
214 CM positive. The findings are consistent with what has been reported repeatedly that stopping the  
215 use of ART leads to increased viral load, suppressing CD4 cells, and exposing patients to OIs like  
216 CM. HIV infection is the common risk of CM, as the risk is estimated to be 95% in PLHIV living  
217 in middle-low-income countries and 80% in high-income countries. Despite TLD being effective  
218 and user-friendly, current studies still report inadequate adherence to ART among PLHIV [33,34].  
219 Although WHO recommends screening for CM to PLHIV with CD4 levels < 100/ul and naive,  
220 studies report the significant prevalence of CM among ART-experienced patients. To fight against  
221 the deadly disease, screening for CM among PLHIV should be done regularly despite the CD4  
222 level and years of being on ART [18]. Furthermore, the use of fluconazole as prophylaxis should  
223 be scaled up to all PLHIV, particularly in developing countries where the majority have immune  
224 problems and access to medical care is a challenge [35]. The latter is possible by taking the

225 example of Isoniazid prophylaxis therapy (IPT) for the prevention of tuberculosis among PLHIV  
226 [19].

227 The study found that the prevalence of CM was higher among unmarried people compared to  
228 married people. Several studies report the importance of PLHIV having a close relative/friend or  
229 spouse be aware of his/her status [36,37]). Advantages of disclosing HIV status include reducing  
230 the level of stigma, having someone to remind a patient to take medication, and clinic schedules  
231 and it improves the quality of living [38]. Therefore, more efforts should be implemented to ensure  
232 that the majority of PLHIVs disclose the status at least to one of the close spouses/relative or friend.  
233 Moreover, our study found no significant difference in CM prevalence between males and females.  
234 The findings are not similar to what was reported in other studies in which the prevalence of CM  
235 was high in males compared to females [20]. The difference observed could be due to the study  
236 setting; our study was conducted in the city of Dar es Salaam, in which both men and women are  
237 considered breadwinners of the family [39]. Therefore, being outdoors both men and women are  
238 equally exposed to contaminated environments.

## 239 **V. Conclusion**

240 The study found the prevalence of CM among PLHIV to be significantly high. Unlike the guideline  
241 recommendation, the majority of PLHIV with CM were treated with fluconazole alone instead of  
242 triple therapy. ART defaulters and marital status were significantly associated with one being CM  
243 positive. Responsible authorities and stakeholders should enforce guideline adherence and a  
244 mechanism should be instituted to ensure PLHIV adheres to medication. Taking an example of  
245 tuberculosis treatment, in which a victim must visit the clinic with a relative, strategies should be  
246 proposed to ensure PLHIV discloses their status to at least a spouse/relative or a close friend.

247 **VI. List of abbreviation**

248 **5-FC:** 5-fluorocytosine(Flucytosine), **ART:** Antiretroviral Therapy, **CTC:** Care and Treatment  
249 Centre, **CD4:** Clusters of Differentiation 4, **CM:** Cryptococcal meningitis, **PLHIV:** People Living  
250 With Human Immunodeficiency Virus, **HIV:** Human Immunodeficiency Virus, **HCPs:** Health  
251 Care Providers, **IPT:** Isoniazid Prophylaxis Therapy, **LIC:** Lower Income Countries, **MUHAS:**  
252 Muhimbili University of Health and Allied Sciences, **RRH:** Regional Referral Hospitals, **SPSS:**  
253 Statistical Package for Social Science, **TLD:** Tenofovir Lamivudine Dolutegravir

254 **VII. Acknowledgements**

255 The authors sincerely thank the Muhimbili University of Health and Allied Sciences – Research  
256 and Ethics Committee (MUHAS-REC) for providing ethical clearance and administration of the  
257 visited hospitals for providing permission to conduct data collection. We also thank each appointed  
258 hospital HCP who helped data collectors to retrieve files and clarified some of the unexplained  
259 information.

260 **VIII. References**

- 261 1. Kisenge PR, Hawkins AT, Maro VP, Mchele JPD, Swai NS, Mueller A, et al. Low CD4  
262 count plus coma predicts cryptococcal meningitis in Tanzania. *BMC Infect Dis.* 2007;7: 1–  
263 5. doi:10.1186/1471-2334-7-39.
- 264 2. Britz E, Perovic O, Von Mollendorf C, Von Gottberg A, Iyaloo S, Quan V, et al. The  
265 epidemiology of meningitis among adults in a south African province with a high HIV  
266 prevalence. 2009-2012. *PLoS One.* 2016;11: doi:10.1371/journal.pone.0163036.
- 267 3. Muzazu SGY, Assefa DG, Phiri C, Getinet T, Solomon S, Yismaw G, et al. Prevalence of

- 268 cryptococcal meningitis among people living with human immuno-deficiency virus and  
269 predictors of mortality in adults on induction therapy in Africa: A systematic review and  
270 meta-analysis. *Front Med.* 2022;9: 1–13. doi:10.3389/fmed.2022.989265
- 271 4. Radha Rajasingham, Rachel M Smith, Benjamin J Park, Joseph N Jarvis, Nelesh P  
272 Govender, Tom M Chiller et al. Global burden of disease of HIV-associated cryptococcal  
273 meningitis: an updated analysis. *Lancet Infect Dis.* 2017;17(8):873-881. doi:  
274 10.1016/S1473-3099(17)30243-8.
- 275 5. Faini D, Maokola W, Furrer H, Hatz C, Battegay M, Tanner M, et al. Burden of serious  
276 fungal infections in Tanzania. *Mycoses.* 2015;58: 70–79. doi:10.1111/myc.12390.
- 277 6. Teekaput C, Yasri S, Chaiwarith R. Cryptococcal Meningitis: Differences between Patients  
278 with and without HIV-Infection. *Pathogens.* 2023;12. doi:10.3390/pathogens12030427.
- 279 7. Baddley JW, Schain DC, Gupte AA, Lodhi SA, Kayler LK, Frade JP, et al. Transmission  
280 of *Cryptococcus neoformans* by organ transplantation. *Clin Infect Dis.* 2011;52: 94–98.  
281 doi:10.1093/cid/ciq216.
- 282 8. Joel Schop. Protective immunity against *cryptococcus neoformans* infection. *McGill J Med.*  
283 2007;10: 35–43. doi:10.26443/mjm.v10i1.467.
- 284 9. Ngan NTT, Flower B, Day JN. Treatment of Cryptococcal Meningitis: How Have We Got  
285 Here and Where are We Going? *Drugs.* 2022;82: 1237–1249. doi:10.1007/s40265-022-  
286 01757-5
- 287 10. NASP. National Guidelines for the Management of HIV and AIDS. Development. 2019;7:  
288 2,274,923,575.

- 289 11. Calmy A, Tovar Sanchez T, Kouanfack C, Mpoudi-Etame M, Leroy S, Perrineau S, et al.  
290 Dolutegravir-based and low-dose efavirenz-based regimen for the initial treatment of HIV-1  
291 infection (NAMSAL): week 96 results from a two-group, multicentre, randomised, open  
292 label, phase 3 non-inferiority trial in Cameroon. *Lancet HIV*. 2020;7: e677–e687.  
293 doi:10.1016/S2352-3018(20)30238-1
- 294 12. de Faria Ferreira M, Brito-Santos F, Henrique Nascimento Theodoro P, de Abreu Almeida  
295 M, Lazera M dos S, Trilles L. Mixed infection by *Cryptococcus neoformans* and  
296 *Cryptococcus gattii* and coinfection with paracoccidioidomycosis in PLHIV. *Med Mycol*  
297 *Case Rep*. 2022;35: 48–50. doi:10.1016/j.mmcr.2022.01.006
- 298 13. Ouedraogo D, Cissoko Y, Soumare M, Alle Akakpo AE, Loua O-O, Konate I, et al.  
299 Neuromeningeal Cryptococcosis and Tuberculosis Coinfection in Bamako: A One-Year  
300 Case Series. *Open Forum Infect Dis*. 2023;10: 1–4. doi:10.1093/ofid/ofad438
- 301 14. Perfect JR, Dismukes WE, Dromer F, Goldman DL, John R, Hamill RJ, et al. Guideline for  
302 cryptococcus. *Clin Infect Dis*. 2018;50: 291–322. doi:10.1086/649858.Clinical
- 303 15. Miot J, Leong T, Takuva S, Parrish A, Dawood H. Cost-effectiveness analysis of flucytosine  
304 as induction therapy in the treatment of cryptococcal meningitis in HIV-infected adults in  
305 South Africa. *BMC Health Serv Res*. 2021;21: 1–11. doi:10.1186/s12913-021-06268-9
- 306 16. Loyse A, Dromer F, Day J, Lortholary O, Harrison TS. Flucytosine and cryptococcosis:  
307 Time to urgently address the worldwide accessibility of a 50-year-old antifungal. *J*  
308 *Antimicrob Chemother*. 2013;68: 2435–2444. doi:10.1093/jac/dkt221
- 309 17. Longley N, Muzoora C, Taseera K, Mwesigye J, Rwebembera J, Chakera A, et al. Dose

- 310 response effect of high-dose fluconazole for HIV-associated cryptococcal meningitis in  
311 southwestern Uganda. *Clin Infect Dis*. 2008;47: 1556–1561. doi:10.1086/593194
- 312 18. Abassi M, Boulware DR, Rhein J. Cryptococcal Meningitis: Diagnosis and Management  
313 Update. *Curr Trop Med Reports*. 2015;2: 90–99. doi:10.1007/s40475-015-0046-y
- 314 19. Hailu K, Niguse S, Hagos K, Abdulkader M. Cryptococcal antigenemia and associated risk  
315 factors among ART-naïve and ART-experienced HIV-infected peoples at selected health  
316 institutions of Mekelle, Northern Ethiopia. *Microbiologyopen*. 2019;8: 1–8.  
317 doi:10.1002/mbo3.746
- 318 20. Negash M, Wondmagegn T, Tajebe F. Opportunistic Cryptococcal Antigenemia in the  
319 HAART Era at HIV Epidemic Settings of Northwest Ethiopia. *Can J Infect Dis Med*  
320 *Microbiol*. 2020;2020. doi:10.1155/2020/5017120
- 321 21. Jemal M, Deress T, Belachew T, Adem Y. Prevalence of Cryptococcal Antigenemia and  
322 Associated Factors among HIV / AIDS Patients at Felege-Hiwot Referral Hospital , Bahir  
323 Dar , Northwest Ethiopia. 2021;2021.
- 324 22. Luma HN, Temfack E, Halle MP, Nguenkam Tchaleu BC, Mapoure YN, Koulla-Shiro S.  
325 Cryptococcal meningoencephalitis in human immunodeficiency virus/acquired  
326 immunodeficiency syndrome in Douala, Cameroon: A cross sectional study. *N Am J Med*  
327 *Sci*. 2013;5: 486–491. doi:10.4103/1947-2714.117318
- 328 23. Lakoh S, Rickman H, Sesay M, Kenneh S, Burke R, Baldeh M, et al. Prevalence and  
329 mortality of cryptococcal disease in adults with advanced HIV in an urban tertiary hospital  
330 in Sierra Leone: A prospective study. *BMC Infect Dis*. 2020;20: 1–7. doi:10.1186/s12879-

331 020-4862-x

332 24. Geda N, Beyene T, Dabsu R, Mengist HM. Prevalence of Cryptococcal Antigenemia and  
333 associated factors among HIV/AIDS patients on second-line antiretroviral therapy at two  
334 hospitals in Western Oromia, Ethiopia. *PLoS One*. 2019;14: 1–13.  
335 doi:10.1371/journal.pone.0225691

336 25. Molloy SF, Chiller T, Greene GS, Burry J, Govender NP, Kanyama C, et al. Cryptococcal  
337 meningitis: A neglected NTD? *PLoS Negl Trop Dis*. 2017;11: 1–7.  
338 doi:10.1371/journal.pntd.0005575

339 26. Kaplan JE, Vallabhaneni S, Smith RM, Chideya-Chihota S, Chehab J, Park B. Cryptococcal  
340 antigen screening and early antifungal treatment to prevent cryptococcal meningitis: A  
341 review of the literature. *J Acquir Immune Defic Syndr*. 2015;68: S331–S339.  
342 doi:10.1097/QAI.0000000000000484

343 27. WHO. Guidelines for the diagnosis, prevention and management of cryptococcal disease.  
344 2018.

345 28. Loyse A, Burry J, Cohn J, Ford N, Chiller T, Ribeiro I, et al. Leave no one behind: response  
346 to new evidence and guidelines for the management of cryptococcal meningitis in low-  
347 income and middle-income countries. *Lancet Infect Dis*. 2019;19: e143–e147.  
348 doi:10.1016/S1473-3099(18)30493-6

349 29. Molloy SF, Kanyama C, Heyderman RS, Loyse A, Kouanfack C, Chanda D, et al.  
350 Antifungal Combinations for Treatment of Cryptococcal Meningitis in Africa. *N Engl J*  
351 *Med*. 2018;378: 1004–1017. doi:10.1056/nejmoa1710922

- 352 30. Kitole FA, Lihawa RM, Mkuna E. Equity in the public social healthcare protection in  
353 Tanzania: does it matter on household healthcare financing? *Int J Equity Health*. 2023;22:  
354 1–14. doi:10.1186/s12939-023-01855-0
- 355 31. Cavassin FB, Baú-Carneiro JL, Vilas-Boas RR, Queiroz-Telles F. Sixty years of  
356 Amphotericin B: An Overview of the Main Antifungal Agent Used to Treat Invasive Fungal  
357 Infections. *Infect Dis Ther*. 2021;10: 115–147. doi:10.1007/s40121-020-00382-7
- 358 32. isangula KG. Prevention of Mother to Child Transmission of HIV Program in Tanzania:  
359 Service Delivery and Uptake Constraints. *SSRN Electron J*. 2012.  
360 doi:10.2139/ssrn.1976890
- 361 33. Kilapilo MS, Sangeda RZ, Bwire GM, Sambayi GL, Mosha IH, Killewo J. Adherence to  
362 Antiretroviral Therapy and Associated Factors Among People Living With HIV Following  
363 the Introduction of Dolutegravir Based Regimens in Dar es Salaam, Tanzania. *J Int Assoc  
364 Provid AIDS Care*. 2022;21: 1–8. doi:10.1177/23259582221084543
- 365 34. Alufandika M, Lawrence DS, Boyer-Chammard T, Kanyama C, Ndhlovu CE, Mosepele M,  
366 et al. A pragmatic approach to managing antiretroviral therapy-experienced patients  
367 diagnosed with HIV-associated cryptococcal meningitis: Impact of antiretroviral therapy  
368 adherence and duration. *Aids*. 2020;34: 1425–1428. doi:10.1097/QAD.0000000000002556
- 369 35. Katende A, Mbwanji G, Faini D, Nyuri A, Kalinjuma AV, Mnzava D, et al. Short-course  
370 amphotericin B in addition to sertraline and fluconazole for treatment of HIV-associated  
371 cryptococcal meningitis in rural Tanzania. *Mycoses*. 2019;62: 1127–1132.  
372 doi:10.1111/myc.12995

- 373 36. Xu JF, Ming ZQ, Zhang YQ, Wang PC, Jing J, Cheng F. Family support, discrimination,  
374 and quality of life among ART-treated HIV-infected patients: A two-year study in China.  
375 *Infect Dis Poverty*. 2017;6: 1–10. doi:10.1186/s40249-017-0364-5
- 376 37. Banagi Yathiraj A, Unnikrishnan B, Ramapuram JT, Kumar N, Mithra P, Kulkarni V, et al.  
377 Factors Influencing Adherence to Antiretroviral Therapy among People Living with HIV in  
378 Coastal South India. *J Int Assoc Provid AIDS Care*. 2016;15: 529–533.  
379 doi:10.1177/2325957416661424
- 380 38. Hallberg D, Kimario TD, Mtuya C, Msuya M, Björling G. Factors affecting HIV disclosure  
381 among partners in Morongo, Tanzania. *Int J Africa Nurs Sci*. 2019;10: 49–54.  
382 doi:10.1016/j.ijans.2019.01.006
- 383 39. Ezeanolue EE, Nwizu C, Greene GS, Amusu O, Chukwuka C, Ndembi N, et al. Brief  
384 Report: Geographical Variation in Prevalence of Cryptococcal Antigenemia among HIV-  
385 Infected, Treatment-Naive Patients in Nigeria: A Multicenter Cross-Sectional Study. *J*  
386 *Acquir Immune Defic Syndr*. 2016;73: 117–121. doi:10.1097/QAI.0000000000001048
- 387
